# Supplementary material
Source: PubMed Central journal article supplement (PMC1913909)
Supplement: pnas_0704866104_2.pdf [file pnas_0704866104_2.pdf]

## SI Table 6. Primers used in this work

---

|                     |   |                                          |
|---------------------|---|------------------------------------------|
| <b><i>virE0</i></b> | F | AGTCAAGCTTGCCATCGTCGGATGATAGGGCAAAC      |
|                     | R | CTGACTCGAGCCGCCAGGTCAACTTACTATCGAC       |
| <b><i>virH1</i></b> | F | AGTCAAGCTTGGCGGCCGGTTTCCAGAGTGGAAATC     |
|                     | R | CTGACTCGAGACGAGGATCGGTGCCAGCAGAAAAG      |
| <b><i>virA</i></b>  | F | AGTCAAGCTTGTTTCGTGTTCAGCTTTGCTTGGTC      |
|                     | R | CTGACTCGAGCTTGGCGCCTGTCTTGAAATCTTGC      |
| <b><i>virB1</i></b> | F | AGTCAAGCTTCGCTGAGCTCGGACATAGGATAGTC      |
|                     | R | CTGACTCGAGAGCGTAGATGGAGCAACGGATGGAG      |
| <b><i>virD1</i></b> | F | AGTCAAGCTTGGCAATGTTGCTTGGAGAGTGTTC       |
|                     | R | CAGTCTCGAGTGGTTCGGGATCAGAAGCAGGTTTG      |
| <b><i>tzs</i></b>   | F | AGTCAAGCTTGGCTCGACAGGGCAAGTTGCTATG       |
|                     | R | CAGTCTCGAGGTCGCGATTTGAGGACAGCATTGC       |
| <b><i>chvA</i></b>  | F | AGTCAAGCTTCACCATGCCGATCACCTTGCGGACGG     |
|                     | R | CTGACTCGAGACGGTTTCGGCGATGGTGATCGCTGC     |
| <b><i>chvD</i></b>  | F | AGTCAAGCTTGGCACGTCCGATCCCTTCCAGCATC      |
|                     | R | CAGTCTCGAGAGAACCTTCTTCGCGCCATAGGAC       |
| <b><i>chvE</i></b>  | F | AGTCAAGCTTATGGCGGGAACGACGAGGCTGATC       |
|                     | R | CAGTCTCGAGAGGACGCAGCACCGATGGCACAAG       |
| <b><i>chvG</i></b>  | F | TGACAAGCTTACAGCTCGCCATGGACCAGGAACGCCACAC |
|                     | R | GCATCTCGAGTTGGTATCGACCGATGCGGAAGCGG      |
| <b><i>chvI</i></b>  | F | TGACAAGCTTCGGCTTCGCCGTTACGGATCGCGTGTTCGT |
|                     | R | GCATCTCGAGAATCGTCTGCACCCATCTTCAGGCCG     |

---

F indicates forward primer; R indicates reverse primer.
