# Supplementary material
Source: PubMed Central journal article supplement (PMC1913909)

WT

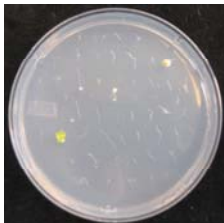

11.6%  
n=86

NahG

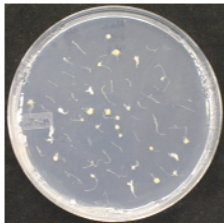

27.9%  
n=79

cpr5-2

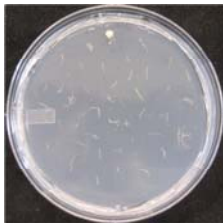

1.0%  
n=101

npr1-1

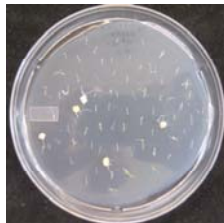

6.0%  
n=101

lox2

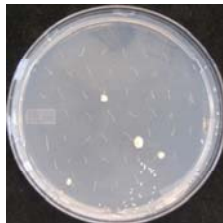

6.0%  
n=166

Supplement: pnas_0704866104_1.pdf [file pnas_0704866104_1.pdf]
